## Defining an Intraoperative Hypotension Threshold in Association with Stroke in Cardiac Surgery: Erratum

In the article “Defining an Intraoperative Hypotension Threshold in Association with Stroke in Cardiac Surgery” (Sun LY, Chung AM, Farkouh ME, van Diepen S, Weinberger J, Bourke M, Ruel M: *ANESTHESIOLOGY* 2018; 129:440–7), errors were discovered in two references.

On page 445 in the first paragraph in the first line, the sentence starting with “In a randomized control study,” was incorrectly attributed to reference number 8 when it should have been attributed to reference number 9.

Also on page 445 the sentence starting with “Subsequently a MAP of no less” that starts at the bottom of the first column and continues into the second column was attributed to reference number 7 when it should have been attributed to reference number 8.

The authors regret the error. The article has been corrected online and in the PDF.

### Reference

Sun LY, Chung AM, Farkouh ME, van Diepen S, Weinberger J, Bourke M, Ruel M: Defining an intraoperative hypotension threshold in association with stroke in cardiac surgery. *ANESTHESIOLOGY* 2018; 129:440–7

## Cyclosporine before Coronary Artery Bypass Grafting Does Not Prevent Postoperative Decreases in Renal Function: A Randomized Clinical Trial: Erratum

In the article “Cyclosporine before Coronary Artery Bypass Grafting Does Not Prevent Postoperative Decreases in Renal Function: A Randomized Clinical Trial” (Ederoth P, Dardashti A, Grins E, Brondén B, Metzsch C, Erdling A, Nozohoor S, Mokhtari A, Hansson MJ, Elmér E, Algotsson L, Jovinge S, Bjursten H: *ANESTHESIOLOGY* 2018; 128:710–7), there is an error in figures 3 and 4.

The figure 3 legend refers to a dashed line that is missing in the figure. The upper line has been changed to a dashed line to match the figure legend: “Fig. 3. Mean values with 95% CI for plasma creatinine in the cyclosporine (*dashed line*) and placebo (*solid line*) groups. The broken axis denotes that a post hoc analysis was performed in the period 1 to 6 months after operation. Preop = preoperative sampling, usually the day of admission. Days 1 to 4 = days after surgery.” Figure 4 and its legend have been updated so that the lines are consistent with figure 3. The dashed line denotes the cyclosporine group and the solid line, the placebo group.

The authors regret these errors. The article has been corrected online and in the PDF.

### Reference

Ederoth P, Dardashti A, Grins E, Brondén B, Metzsch C, Erdling A, Nozohoor S, Mokhtari A, Hansson MJ, Elmér E, Algotsson L, Jovinge S, Bjursten H: Cyclosporine before coronary artery bypass grafting does not prevent postoperative decreases in renal function: A randomized clinical trial. *ANESTHESIOLOGY* 2018; 128:710–7
